# Supplementary material for: Fast and Sustained Axonal Growth by BDNF Released from Chitosan Microspheres
Source: MDPI journal article supplement (doi:10.3390/md21020091), 2023-01-27
Supplement: s1 [file s1]

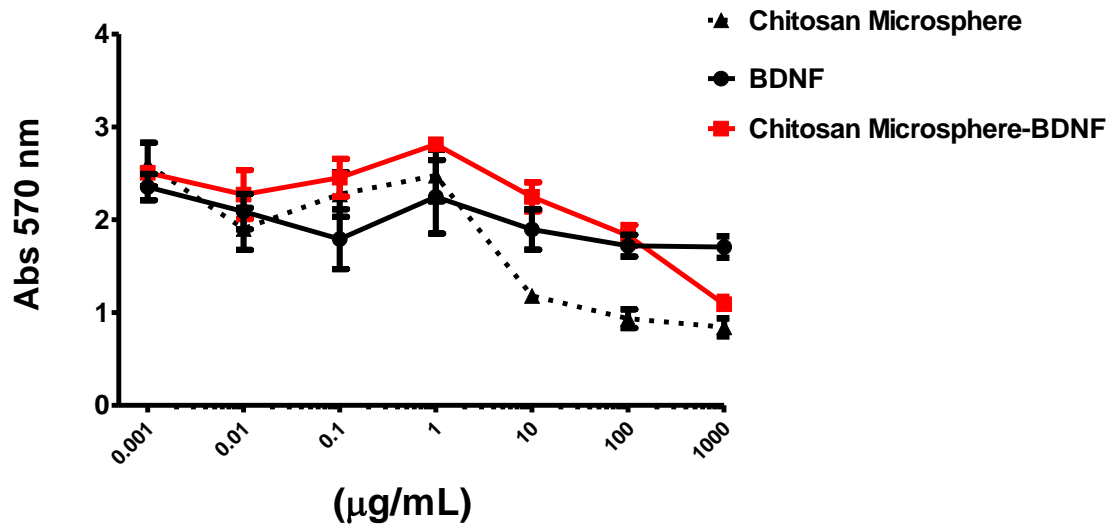

Figure S1. Cytotoxicity of BDNF-loaded chitosan microspheres in PC12 cells. The MTT viability assay was performed to follow the metabolism of PC12 cells incubated for 3 days with experimental variants as shown. There were not significant differences between chitosan microsphere-BDNF treatment and controls (ANOVA,  $p = 0.34$ ).
